# Supplementary material
Source: Springer Nature journal article supplement (https://www.springermedizin.de/resource/supplementary/13002_2010_206_MOESM4_ESM.pdf/9627382)

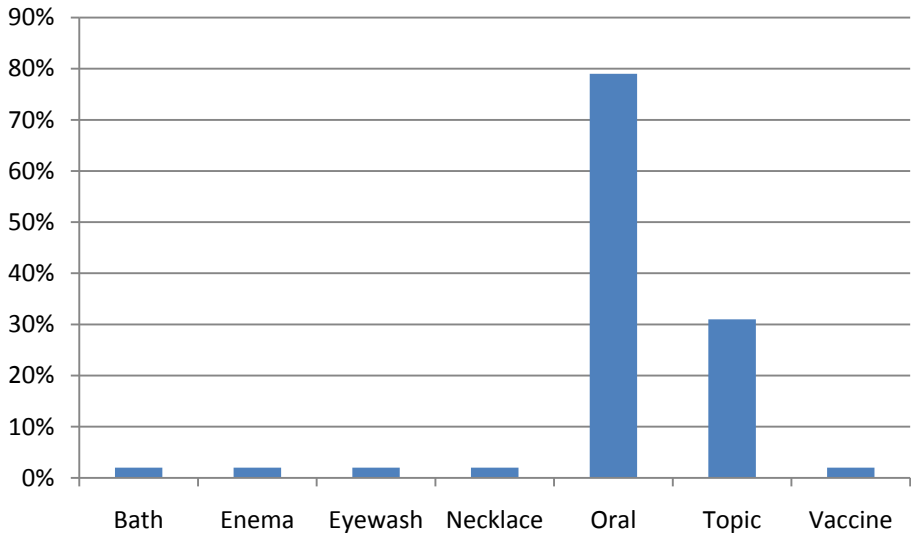

Supplement: MOESM4 [file 9627382]
